# Supplementary material
Source: PubMed Central journal article supplement (PMC3910758)
Supplement: AAC.01025-13_zac001142455so1.pdf [file AAC.01025-13_zac001142455so1.pdf]

| <i>C. parapsilosis</i> isolates | Antifungals | MIC (mg/L) | Phenotype | Source of isolation                        |
|---------------------------------|-------------|------------|-----------|--------------------------------------------|
| 35176                           | CAS<br>ANF  | >16<br>2   | R<br>S    | prosthetic valve endocarditis <sup>a</sup> |
| 35177                           | CAS<br>ANF  | 2<br>1     | S<br>S    | prosthetic valve endocarditis <sup>a</sup> |
| 20447.040                       | CAS<br>ANF  | 4<br>1     | I<br>S    | Blood                                      |

**Table S1.** Characteristics and susceptibilities of *C. parapsilosis* isolates to echinocandins. CAS: Caspofungin, ANF: Anidulafungin, S: Sensitive, R: Resistant, I: Intermediate sensitive.

<sup>a</sup> That isolate was obtained from the Infectious Diseases Laboratory at the Wayne State University at Detroit, Michigan, USA. <sup>b</sup> This isolate was obtained from St. Lukes Episcopal Hospital, of the Houston, Texas, USA.
